# Supplementary material
Source: HighWire-hosted journal article supplement (https://bmjopen.bmj.com/content/15/5/e091956)
Supplement: inline-supplementary-material-4 [file inline-supplementary-material-4.pdf]

Table 1: Participant timeline

|                                                                                                  | Timeline                                 |           |     |                                                                                   |       |   |    |    |    |       |                |
|--------------------------------------------------------------------------------------------------|------------------------------------------|-----------|-----|-----------------------------------------------------------------------------------|-------|---|----|----|----|-------|----------------|
|                                                                                                  |                                          | Enrolment |     | Start                                                                             | Weeks |   |    |    |    |       |                |
| Person in charge                                                                                 | Time point                               | -Y*       | -X* | 0                                                                                 | 4     | 8 | 12 | 16 | 26 | 46-48 | 52 / close-out |
| Physician                                                                                        | Diagnosis                                | x         |     |                                                                                   |       |   |    |    |    |       |                |
| Physician                                                                                        | Treatment plan                           | x         |     |                                                                                   |       |   |    |    |    |       |                |
| Study nurse / part of the research team                                                          | Consent for the trial                    | x         |     |                                                                                   |       |   |    |    |    |       |                |
| Physician                                                                                        | Surgery                                  |           | x   |                                                                                   |       |   |    |    |    |       |                |
| Physiotherapist                                                                                  | Physiotherapy                            |           |     | x                                                                                 | x     |   | x  |    |    |       | x              |
| Study nurse / part of the research team                                                          | Administration of the Oura ring          | x         |     |                                                                                   |       |   |    |    |    | x     |                |
| Study nurse / part of the research team                                                          | Retrieval of the Oura ring               |           |     |                                                                                   |       |   | x  |    |    |       | x              |
| Physiotherapist                                                                                  | Monitoring of Oura ring's variables      |           |     |  |       |   |    |    |    |       |                |
| Physician                                                                                        | Xray of operated limb                    | x         |     |                                                                                   |       |   | x  |    |    |       |                |
| Stored in                                                                                        | Result variables                         |           |     |                                                                                   |       |   |    |    |    |       |                |
| REDCap / present & link via email                                                                | Oxford Knee Score (OKS)                  | x         |     |                                                                                   |       |   | x  |    | x  |       | x              |
| REDCap / present & link via email                                                                | Self-reported quality of life (EQ-5D-5L) | x         |     |                                                                                   |       |   | x  |    | x  |       | x              |
| REDCap / present & link via email                                                                | Forgotten Joint Score 12 (FJS-12)        | x         |     |                                                                                   |       |   | x  |    | x  |       | x              |
| REDCap / present & link via email                                                                | Visual analog scale (VAS)                | x         |     |                                                                                   |       |   | x  |    | x  |       | x              |
| REDCap / present                                                                                 | Connor-Davidson resilience scale         | x         |     |                                                                                   |       |   |    |    |    |       |                |
| REDCap / present                                                                                 | Life optimism questionnaire              | x         |     |                                                                                   |       |   |    |    |    |       |                |
| REDCap / present                                                                                 | Active ROM                               | x         |     |                                                                                   |       |   | x  |    |    |       | x              |
| REDCap / present                                                                                 | Passive ROM                              | x         |     |                                                                                   |       |   | x  |    |    |       | x              |
| REDCap / present                                                                                 | UCLA activity level                      | x         |     |                                                                                   |       |   |    |    |    |       |                |
| REDCap / present                                                                                 | Weight and body mass index               | x         |     |                                                                                   |       |   |    |    |    |       | x              |
| * = Enrolment time varies between weeks and months, depending on the time of preoperative visit. |                                          |           |     |                                                                                   |       |   |    |    |    |       |                |
